# Supplementary material for: Spherical Co3S4 grown directly on Ni–Fe sulfides as a porous nanoplate array on FeNi3 foam: a highly efficient and durable bifunctional catalyst for overall water splitting
Source: Royal Society of Chemistry journal article supplement (doi:10.1039/d1ta07504g), 2022-01-01
Supplement: d1ta07504g1.pdf [file d1ta07504g1.pdf]

## Electronic Supplementary Information

### **Spherical Co<sub>3</sub>S<sub>4</sub> grown directly on Ni-Fe sulfides as porous nanoplate array on FeNi<sub>3</sub> foam: A highly efficient and durable bifunctional catalyst for Overall Water Splitting**

Jun Shen<sup>1</sup>, Qin Li<sup>1</sup>, Wenxiu Zhang<sup>1</sup>, Zhenyu Cai<sup>1</sup>, Liang Cui<sup>2</sup>, Xiuping Liu<sup>2\*</sup>, Jingquan Liu<sup>1,2\*</sup>

<sup>1</sup>*College of Materials Science and Engineering, Institute for Graphene Applied*

*Technology Innovation, Qingdao University, Qingdao, 266071, China.*

<sup>2</sup>*College of Materials Science and Engineering, Linyi University, Linyi, 276000*

*Shandong, China*

\*Corresponding authors.

E-mails: lpxin@163.com (Xiuping Liu), jliu@qdu.edu.cn (Jingquan Liu)

## **Experimental section**

### **Preparation of Pt/C and RuO<sub>2</sub> electrodes**

5 mg of Pt/C was mixed with 450  $\mu\text{L}$  of deionized water, 450  $\mu\text{L}$  of absolute ethanol, and 20  $\mu\text{L}$  of Nafion (5 wt%), and the resulting mixture was sonicated for 60 min to obtain Pt/C ink. RuO<sub>2</sub> ink was prepared using the same method. Then use a pipette to draw 2  $\mu\text{L}$  ink each time, which was carefully dropped onto the FeNi<sub>3</sub> foam and then dried naturally at room temperature. The total ink added was 50  $\mu\text{L}$ , which was dropped in 25 times for the coating. Using this method, Pt/C electrodes and RuO<sub>2</sub> electrodes were prepared separately. The loading of Pt/C and RuO<sub>2</sub> on FeNi<sub>3</sub> foam are 1.08 mg cm<sup>-2</sup>.

### **Electrochemical impedance spectroscopy (EIS)**

In order to perform a more comprehensive test of the material, the EIS test of the electrode material was carried out under the operating conditions of OER. The test voltage applied to the material ranges from 100 kHz to 10 mHz.

### **Effective electrode surface area (ECSA) calculation**

In order to fully demonstrate the excellent properties of the material, the ECSA of the material was estimated. In a 1.0 M KOH electrolyte solution, the material was subjected to 10 CV cycles in a voltage window from -0.15V to -0.25V vs. RHE. The test was carried out to obtain cyclic voltammograms (CVs) of the material. The electrochemical double layer capacitor ( $C_{dl}$ ) of the material under the non-Faradaic overpotential, it can be obtained by CV at different scanning rates (10 mV s<sup>-1</sup>, 20 mV s<sup>-1</sup>, 30 mV s<sup>-1</sup>, 40 mV s<sup>-1</sup> and 50 mV s<sup>-1</sup>). The difference in current density between

the anodic and cathodic sweeps is linear with the scan rate. A linear relationship between the two is obtained by plotting, and then the slope is obtained by data fitting, which is twice the  $C_{dl}$ . Then the ECSA of the material can be estimated by Eqn. S1:

$$ECSA = C_{dl}/C_s \quad \text{Eqn. S1}$$

where  $C_s$  is the specific capacitance, whose value is reported to be  $0.040 \text{ mF cm}^{-2}$  in  $1.0 \text{ M KOH}$ [1].

### **Electrochemical contrast test**

Pure graphite rods (6 mm in diameter, 99.999% purity trace metals basis) were obtained from Gaoss Union (Tianjin) Optoelectronics Technology Co., Ltd. Under other conditions unchanged, the pure graphite rods electrode (6 mm in diameter) was used instead of the Pt electrode, and the HER test was carried out on this catalyst  $\text{NiFeCoS}_x@\text{FeNi}_3$ . And the OER tests of synthetic material  $\text{NiFeCoS}_x@\text{FeNi}_3$  in  $1.0 \text{ M KOH}$  solution with a scanning rate of  $10 \text{ mV s}^{-1}$ ,  $5 \text{ mV s}^{-1}$ ,  $2 \text{ mV s}^{-1}$  and  $1 \text{ mV s}^{-1}$ .

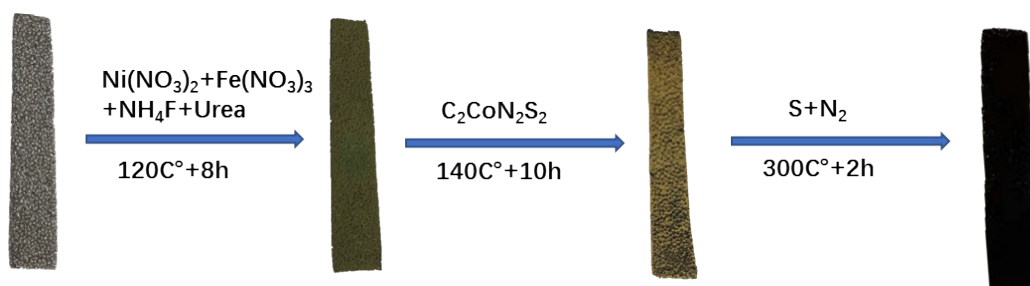

Fig. S1 Photograph of  $\text{FeNi}_3$  (first left);  $\text{NiFe LDH@FeNi}_3$  (second from left);  $\text{NiFeCo LTHs@FeNi}_3$  (third from the left) and  $\text{NiFeCoS}_x@FeNi_3$  (right).

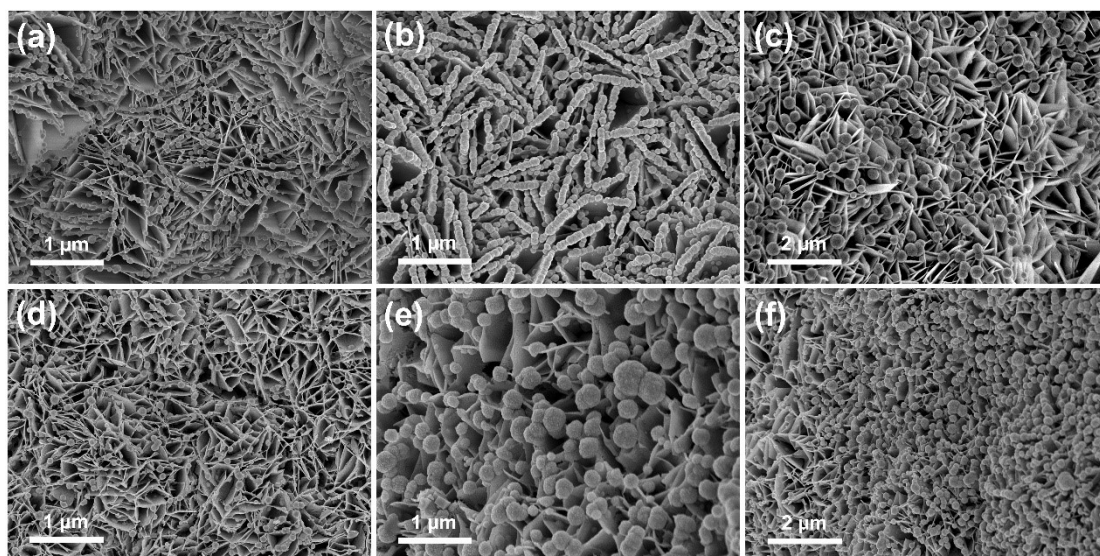

Fig. S2 SEM images of (a-c) NiFeCo LTHs@FeNi<sub>3</sub>, (d-f) NiFeCoS<sub>x</sub>@FeNi<sub>3</sub>.

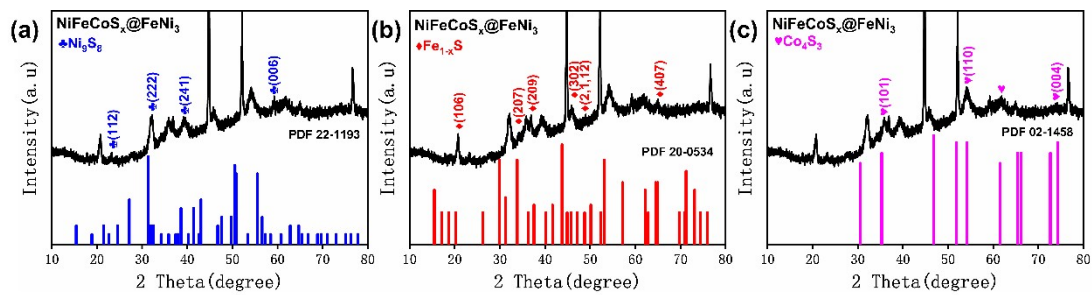

Fig. S3 XRD patterns of (a) Ni<sub>9</sub>S<sub>8</sub>, (b) Fe<sub>1-x</sub>S, (c) Co<sub>4</sub>S<sub>3</sub>.

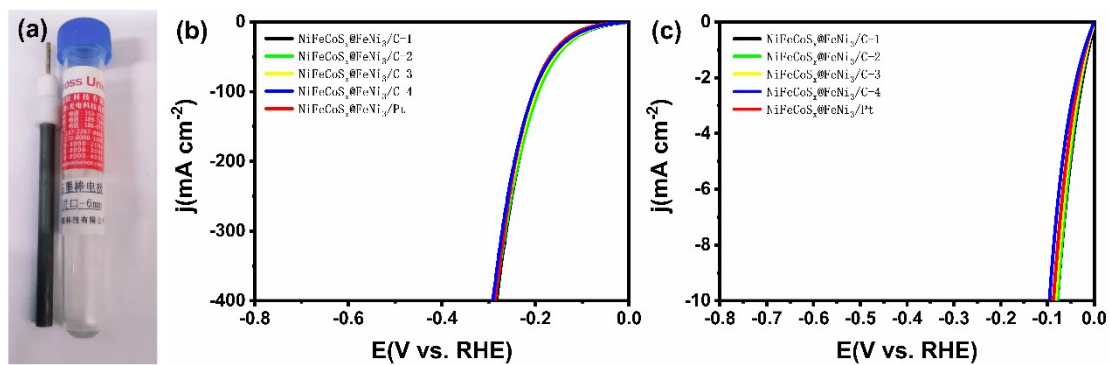

Fig. S4 (a) the pure carbon rod electrode (6 mm in diameter, 99.999% purity trace metals basis), (b) and (c) Polarization LSV curves for HER at a scan rate of 5 mV s<sup>-1</sup> (iR-corrected).

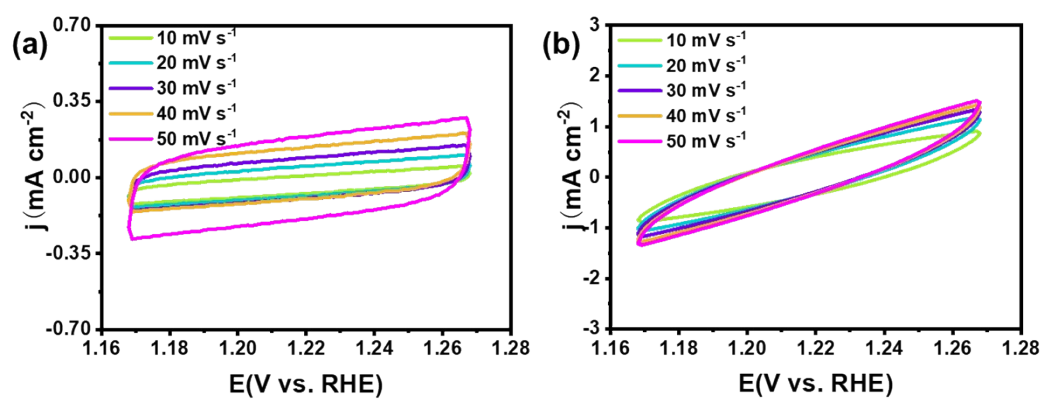

Fig. S5 Cyclic voltammograms (CVs) for (a) NiFe LDH@FeNi<sub>3</sub> and (b) NiFeCo LTHs@FeNi<sub>3</sub> at scan rates of 10, 20, 30, 40 and 50 mV s<sup>-1</sup>.



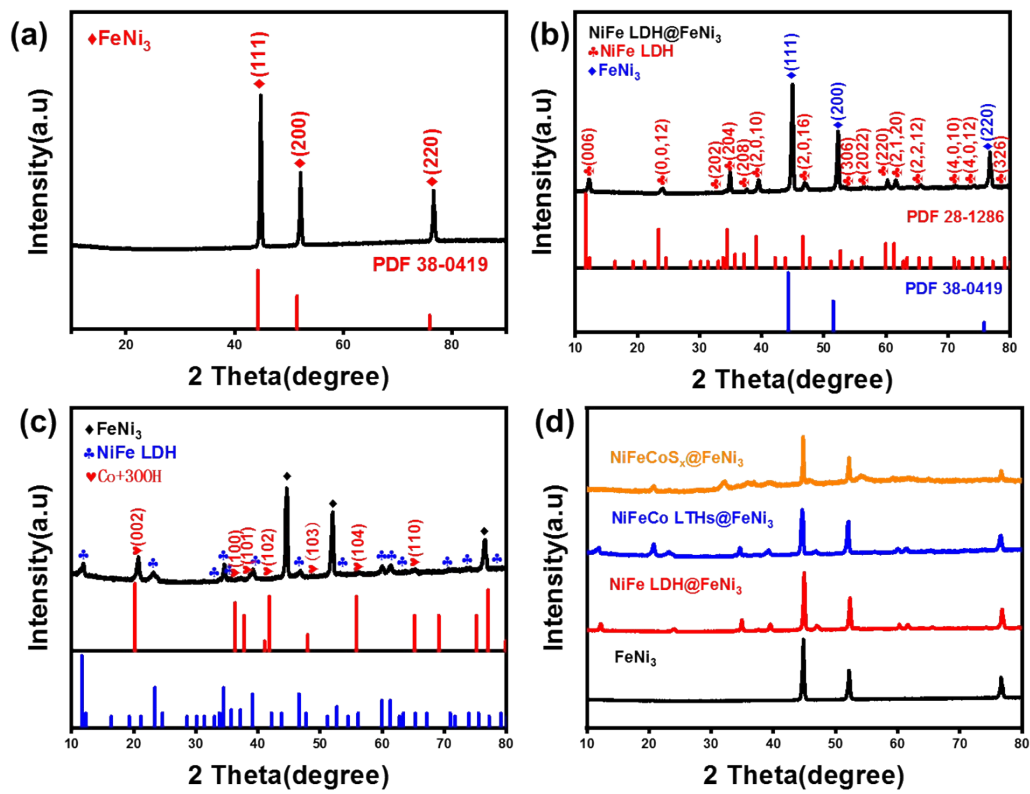

Fig. S6 XRD patterns of (a)  $\text{FeNi}_3$ , (b)  $\text{NiFe LDH}@FeNi_3$ , (c)  $\text{NiFeCo LTHs}@FeNi_3$ , (d)  $\text{FeNi}_3$ ,  $\text{NiFe LDH}@FeNi_3$ ,  $\text{NiFeCo LTHs}@FeNi_3$  and  $\text{NiFeCoS}_x@FeNi_3$ .

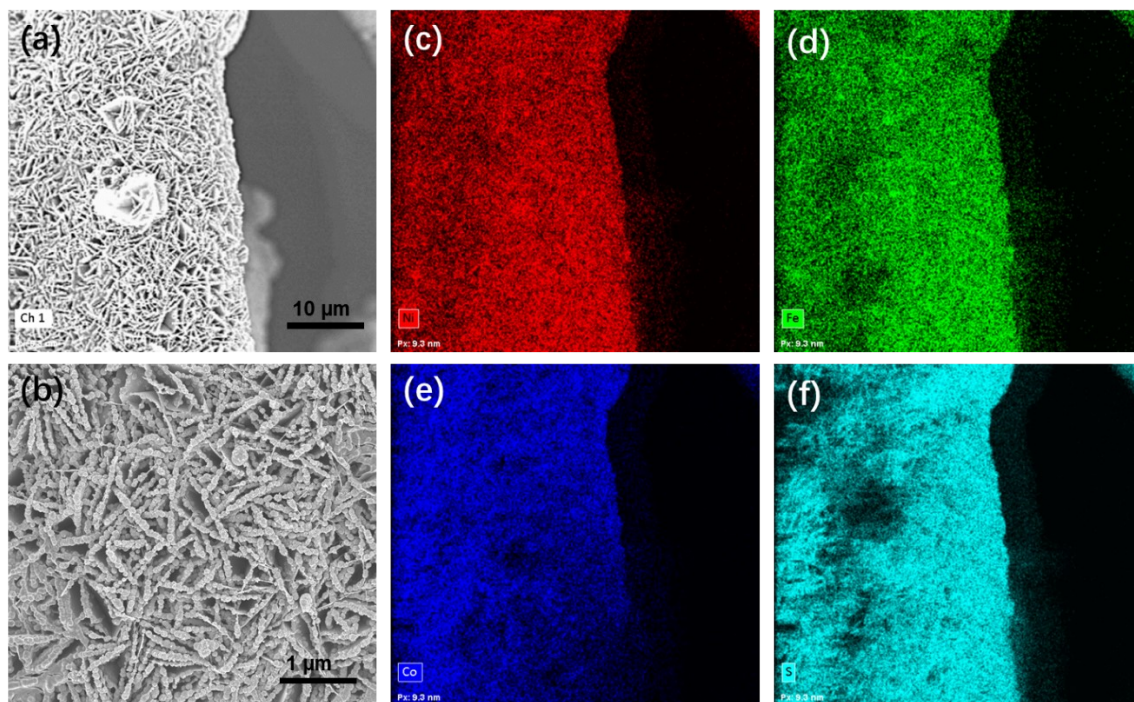

Fig. S7 (a-b) SEM image of  $\text{NiFeCoS}_x@\text{FeNi}_3$ . (c-f) the corresponding elemental mapping images of Fe, Ni, Co and S in  $\text{NiFeCoS}_x@\text{FeNi}_3$ .

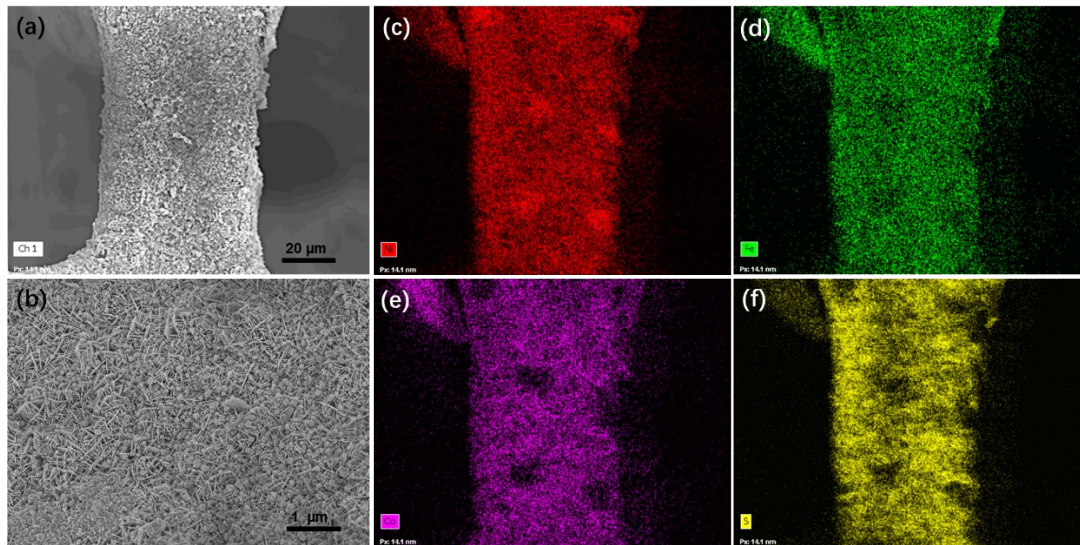

Fig. S8 (a-b) SEM image of  $\text{NiFeCoS}_x@FeNi_3$  and (c-f) the corresponding elemental mapping images of Ni, Fe, Co and S in  $\text{NiFeCoS}_x@FeNi_3$  after 90 h long-term stability test for OER in 1.0 M KOH solution.

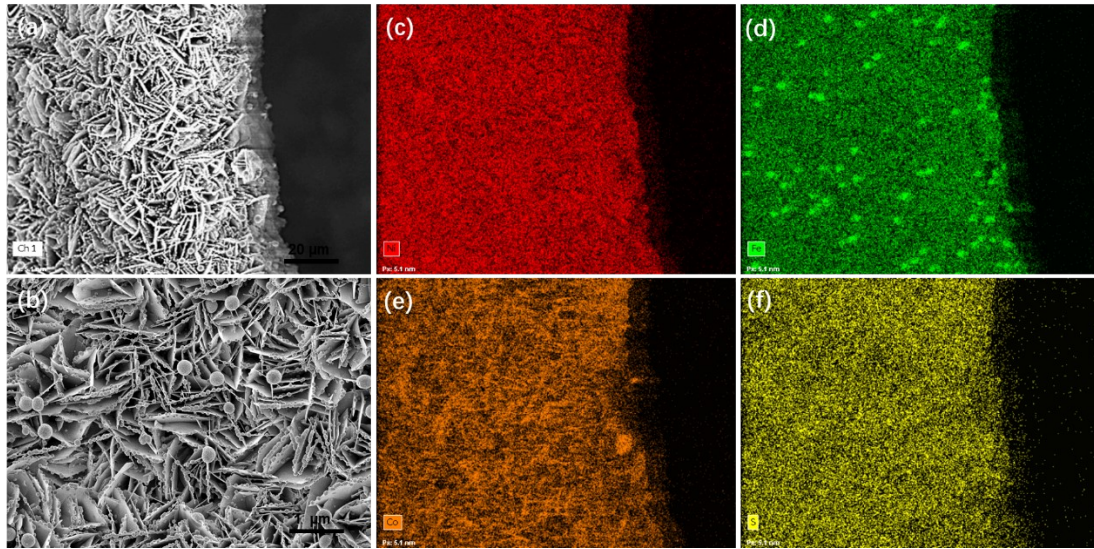

Fig. S9 (a-b) SEM image of  $\text{NiFeCoS}_x\text{@FeNi}_3$  and (c-f) the corresponding elemental mapping images of Ni, Fe, Co and S in  $\text{NiFeCoS}_x\text{@FeNi}_3$  after 40 h long-term stability test for HER in 1.0 M KOH solution.

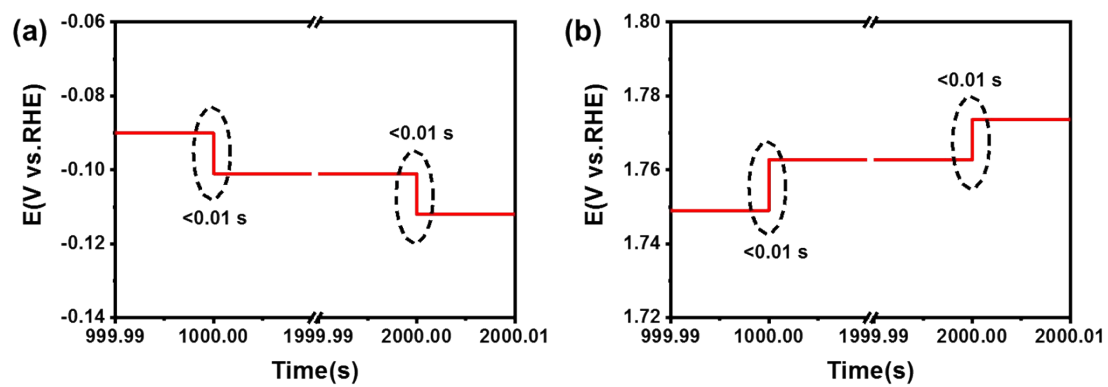

Fig. S10 The response time of (a) HER and (b) OER in the potential transition of ISTEP in 1.0 M KOH solution.



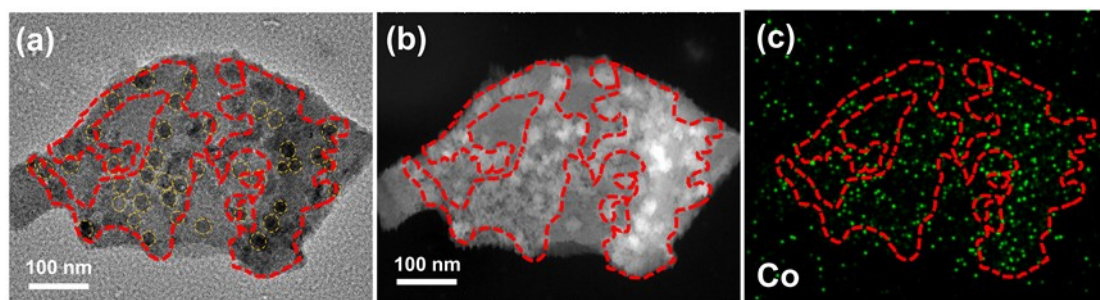

Fig. S11 The marked diagram of the scattered areas of the Co element for (a)TEM image of  $\text{NiFeCoS}_x@FeNi_3$ , (b) HAADF-STEM image of  $\text{NiFeCoS}_x@FeNi_3$  and (c) the corresponding elemental mapping images of Co in  $\text{NiFeCoS}_x@FeNi_3$ .

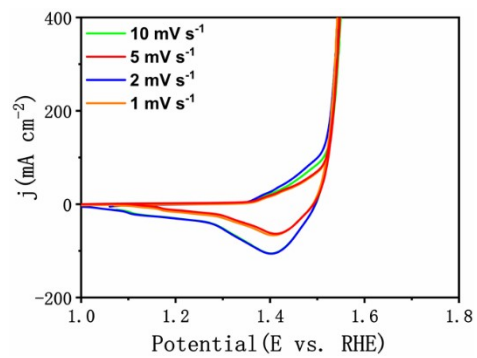

Fig. S12 The OER polarisation LSV curves for NiFeCoS<sub>x</sub>@FeNi<sub>3</sub> with scan rates of 10 mV s<sup>-1</sup>, 5 mV s<sup>-1</sup>, 2 mV s<sup>-1</sup> and 1 mV s<sup>-1</sup> (iR-corrected).

Table S1 The comparison of catalytic performances for HER between NiFeCoS<sub>x</sub>@FeNi<sub>3</sub> and other materials reported in the literature.

| Catalyst                                                                             | Overpotential | Tafel slope | Electrolyte | Reference |
|--------------------------------------------------------------------------------------|---------------|-------------|-------------|-----------|
| NiFeCoS <sub>x</sub> @FeNi <sub>3</sub>                                              | 88@10         | 116         | 1M KOH      | This work |
| NiFeCo LTHs@FeNi <sub>3</sub>                                                        | 112@10        | 187         | 1M KOH      | This work |
| NiFe LDH@FeNi <sub>3</sub>                                                           | 168@10        | 194         | 1M KOH      | This work |
| (Ni,Fe)S <sub>2</sub> /MoS <sub>2</sub>                                              | 130@10        | 101.22      | 1M KOH      | [2]       |
| FeCo <sub>2</sub> S <sub>4</sub>                                                     | 132@10        | 164         | 1M KOH      | [3]       |
| NiCo/NiCo <sub>2</sub> S <sub>4</sub> /NiCo/Ni                                       | 132@10        | 58.2        | 1M KOH      | [4]       |
| Ni <sub>x</sub> Co <sub>3-x</sub> S <sub>4</sub> /Ni <sub>3</sub> S <sub>2</sub> /NF | 136@10        | 107         | 1M KOH      | [1]       |
| Sn-Ni <sub>3</sub> S <sub>2</sub> /NF                                                | 137@10        | 148         | 1M KOH      | [5]       |
| NiCoFe LTHs/CFC                                                                      | 200@10        | 70          | 1M KOH      | [6]       |
| NiFeS/NF                                                                             | 180@10        | 53          | 1M KOH      | [7]       |
| V-Ni <sub>3</sub> S <sub>2</sub> -NW                                                 | 203@20        | 112         | 1M KOH      | [8]       |
| Ni-Co-S                                                                              | 228@10        | 101.76      | 1M KOH      | [9]       |
| (Fe <sub>0.5</sub> Ni <sub>0.5</sub> )S <sub>2</sub>                                 | 250@10        | 115.9       | 1M KOH      | [10]      |



Table S2 The comparison of catalytic performances for OER between NiFeCoS<sub>x</sub>@FeNi<sub>3</sub> and other materials reported in the literature.

| Catalyst                                                                      | Overpotential (mV) | Tafel slope (mV dec <sup>-1</sup> ) | Electrolyte | Reference |
|-------------------------------------------------------------------------------|--------------------|-------------------------------------|-------------|-----------|
| NiFeCoS <sub>x</sub> @FeNi <sub>3</sub>                                       | 210@10             | 45                                  | 1M KOH      | This work |
| NiFeCo LTHs@FeNi <sub>3</sub>                                                 | 275@10             | 68                                  | 1M KOH      | This work |
| NiFe LDH@FeNi <sub>3</sub>                                                    | 380@10             | 172                                 | 1M KOH      | This work |
| Ni <sub>3</sub> S <sub>2</sub> /Co(OH) <sub>2</sub>                           | 257@10             | 63.1                                | 1M KOH      | [11]      |
| NiCo <sub>2</sub> S <sub>4</sub> NW/NF                                        | 260@10             | 40                                  | 1M KOH      | [12]      |
| Ni-Co-S                                                                       | 270@40             | 133.8                               | 1M KOH      | [13]      |
| (Fe <sub>0.5</sub> Ni <sub>0.5</sub> )S <sub>2</sub>                          | 270@10             | 74.41                               | 1M KOH      | [10]      |
| (Ni,Fe)S <sub>2</sub> /MoS <sub>2</sub>                                       | 270@10             | 43.21                               | 1M KOH      | [14]      |
| Fe-Co <sub>9</sub> S <sub>8</sub> NM                                          | 270@10             | 70                                  | 1M KOH      | [15]      |
| Ni-Co-P-S                                                                     | 280@10             | 69                                  | 1M KOH      | [16]      |
| Fe-Ni-O <sub>x</sub> /GC                                                      | 286@10             | 48                                  | 1M KOH      | [17]      |
| LiCo <sub>0.33</sub> Ni <sub>0.33</sub> Fe <sub>0.33</sub> O <sub>2</sub> /GC | 295@10             | 46                                  | 1M KOH      | [18]      |
| FeNiS <sub>2</sub> NSs                                                        | 310@10             | 46                                  | 1M KOH      | [19]      |
| NiCoFe LTHs/CFC                                                               | 240@10             | 32                                  | 1M KOH      | [6]       |
| NiCoFe LDHs                                                                   | 275@10             | 52                                  | 1M KOH      | [20]      |

Table S3 The value of  $C_{dl}$  for different catalysts in 1.0 M KOH solution.

| Samples                                                        | $C_{dl}$ (mF cm <sup>-2</sup> ) | Reference |
|----------------------------------------------------------------|---------------------------------|-----------|
| NiFeCoS <sub>x</sub> @FeNi <sub>3</sub>                        | 248                             | This work |
| NiFeCo LTHs@FeNi <sub>3</sub>                                  | 46.9                            | This work |
| NiFe LDH@FeNi <sub>3</sub>                                     | 3                               | This work |
| Co <sub>4</sub> S <sub>3</sub> -NiCo LDH/CC                    | 7.36                            | [21]      |
| (Ni <sub>0.5</sub> Fe <sub>0.5</sub> ) <sub>2</sub> P          | 5.5                             | [22]      |
| Y-S Ni-Co-Se/CFP                                               | 8                               | [23]      |
| CoS <sub>x</sub> /Ni <sub>3</sub> S <sub>2</sub> @NF           | 8.68                            | [24]      |
| Co <sub>0.7</sub> Fe <sub>0.3</sub> P <sub>3</sub>             | 11.3                            | [25]      |
| CoP-Co <sub>2</sub> P@PC/PG NHs                                | 23.5                            | [26]      |
| Co-CoO <sub>x</sub> @CN                                        | 29.6                            | [27]      |
| Co <sub>9</sub> S <sub>8</sub> @Co <sub>3</sub> O <sub>4</sub> | 38                              | [28]      |

## References

- [1] Y. Wu, Y. Liu, G. Li, X. Zou, X. Lian, D. Wang, L. Sun, T. Asefa, X. Zou, Efficient electrocatalysis of overall water splitting by ultrasmall  $\text{Ni}_x\text{Co}_{3-x}\text{S}_4$  coupled  $\text{Ni}_3\text{S}_2$  nanosheet arrays, *Nano Energy*, 35 (2017) 161-170.
- [2] Y. Liu, S. Jiang, S. Li, L. Zhou, Z. Li, J. Li, M. Shao, Interface engineering of  $(\text{Ni}, \text{Fe})\text{S}_2@\text{MoS}_2$  heterostructures for synergetic electrochemical water splitting, *Applied Catalysis B-Environmental*, 247 (2019) 107-114.
- [3] J. Hu, Y. Ou, Y. Li, D. Gao, Y. Zhang, P. Xiao,  $\text{FeCo}_2\text{S}_4$  Nanosheet Arrays Supported on Ni Foam: An Efficient and Durable Bifunctional Electrocatalyst for Overall Water-Splitting, *ACS Sustain. Chem. Eng.*, 6 (2018) 11724-11733.
- [4] Y. Ning, D. Ma, Y. Shen, F. Wang, X. Zhang, Constructing hierarchical mushroom-like bifunctional  $\text{NiCo}/\text{NiCo}_2\text{S}_4@\text{NiCo}/\text{Ni}$  foam electrocatalysts for efficient overall water splitting in alkaline media, *Electrochim. Acta*, 265 (2018) 19-31.
- [5] J. Yu, F.-X. Ma, Y. Du, P.-P. Wang, C.-Y. Xu, L. Zhen, In Situ Growth of Sn-Doped  $\text{Ni}_3\text{S}_2$  Nanosheets on Ni Foam as High-Performance Electrocatalyst for Hydrogen Evolution Reaction, *Chemelectrochem*, 4 (2017) 594-600.
- [6] L. Qian, Z. Lu, T. Xu, X. Wu, Y. Tian, Y. Li, Z. Huo, X. Sun, X. Duan, Trinary Layered Double Hydroxides as High-Performance Bifunctional Materials for Oxygen Electrocatalysis, *Advanced Energy Materials*, 5 (2015).
- [7] S. Shanmugam, P. Ganesan, A. Sivanantham, Inexpensive electrochemical synthesis of nickel iron sulphides on nickel foam: Super active and ultra-durable

electrocatalysts for alkaline electrolyte membrane water electrolysis, *J. Mater. Chem. A*, (2016).

[8] Y. Qu, M. Yang, J. Chai, Z. Tang, M. Shao, C.T. Kwok, M. Yang, Z. Wang, D. Chua, S. Wang, Z. Lu, H. Pan, Facile Synthesis of Vanadium-Doped Ni<sub>3</sub>S<sub>2</sub> Nanowire Arrays as Active Electrocatalyst for Hydrogen Evolution Reaction, *ACS Appl. Mater. Interfaces*, 9 (2017) 5959-5967.

[9] D. Zhang, W. He, Z. Zhang, X. Xu, Structure-design and synthesis of Nickel-Cobalt-Sulfur arrays on nickel foam for efficient hydrogen evolution, *J. Alloys Compd.*, 785 (2019) 468-474.

[10] N. Xiong, S. Wang, Y. Xie, Q. Feng, X. Wang, M. Li, Z. Xu, W. Zhou, K. Pan, Multifunctional (Fe<sub>0.5</sub>Ni<sub>0.5</sub>)S<sub>2</sub> nanocrystal catalysts with high catalytic activities for reduction of I<sup>3-</sup> and electrochemical water splitting, *Res. Chem. Intermed.*, 44 (2018) 4307-4322.

[11] S. Wang, L. Xu, W. Lu, Synergistic effect: Hierarchical Ni<sub>3</sub>S<sub>2</sub>@Co(OH)<sub>2</sub> heterostructure as efficient bifunctional electrocatalyst for overall water splitting, *Appl. Surf. Sci.*, 457 (2018) 156-163.

[12] A. Sivanantham, P. Ganesan, S. Shanmugam, Hierarchical NiCo<sub>2</sub>S<sub>4</sub> nanowire arrays supported on ni foam: An efficient and durable bifunctional electrocatalyst for oxygen and hydrogen evolution reactions, *Adv. Funct. Mater.*, 26 (2016) 4661-4672.

[13] Y. Gong, Z. Xu, H. Pan, Y. Lin, Z. Yang, J. Wang, A 3D well-matched electrode pair of Ni-Co-S//Ni-Co-P nanoarrays grown on nickel foam as a high-performance electrocatalyst for water splitting, *J. Mater. Chem. A*, 6 (2018) 12506-12514.

- [14] Y. Liu, S. Jiang, S. Li, L. Zhou, Z. Li, J. Li, M. Shao, Interface engineering of (Ni, Fe)S<sub>2</sub>@MoS<sub>2</sub> heterostructures for synergetic electrochemical water splitting, *Appl. Catal., B*, 247 (2019) 107-114.
- [15] W. Gao, J. Qin, K. Wang, K. Yan, Z. Liu, J. Lin, Y. Chai, C. Liu, B. Dong, Facile synthesis of Fe-doped Co<sub>9</sub>S<sub>8</sub> nano-microspheres grown on nickel foam for efficient oxygen evolution reaction, *Appl. Surf. Sci.*, 454 (2018) 46-53.
- [16] Y. Tian, Z. Lin, J. Yu, S. Zhao, Q. Liu, J. Liu, R. Chen, Y. Qi, H. Zhang, R. Li, J. Li, J. Wang, Superaerophobic Quaternary Ni–Co–S–P Nanoparticles for Efficient Overall Water-Splitting, *ACS Sustain. Chem. Eng.*, 7 (2019) 14639-14646.
- [17] L. Kuai, J. Geng, C. Chen, E. Kan, Y. Liu, Q. Wang, B. Geng, A Reliable Aerosol-Spray-Assisted Approach to Produce and Optimize Amorphous Metal Oxide Catalysts for Electrochemical Water Splitting, *Angew. Chem. Int. Ed.*, 53 (2014) 7547-7551.
- [18] Z. Lu, H. Wang, D. Kong, K. Yan, P. Hsu, G. Zheng, H. Yao, Z. Liang, X. Sun, Y. Cui, Electrochemical tuning of layered lithium transition metal oxides for improvement of oxygen evolution reaction, *Nat. Commun.*, 5 (2014) 4345.
- [19] J. Jiang, S. Lu, H. Gao, X. Zhang, H. Yu, Ternary FeNiS<sub>2</sub> ultrathin nanosheets as an electrocatalyst for both oxygen evolution and reduction reactions, *Nano Energy*, 27 (2016) 526-534.
- [20] H. Liang, F. Meng, M. Caban-Acevedo, L. Li, A. Forticaux, L. Xiu, Z. Wang, S. Jin, Hydrothermal continuous flow synthesis and exfoliation of NiCo layered double hydroxide nanosheets for enhanced oxygen evolution catalysis, *Nano Lett.*, 15 (2015)

1421-1427.

[21] X.Y. Zang, X. Zhang, J.X. Guo, Electrodeposition of Co<sub>4</sub>S<sub>3</sub> on NiCo LDH nanosheet arrays for advanced hydrogen evolution, *Mater. Lett.*, 285 (2021) 5.

[22] J. Yu, G. Cheng, W. Luo, Hierarchical NiFeP microflowers directly grown on Ni foam for efficient electrocatalytic oxygen evolution, *J. Mater. Chem. A*, 5 (2017) 11229-11235.

[23] K. Ao, J. Dong, C. Fan, D. Wang, Y. Cai, D. Li, F. Huang, Q. Wei, Formation of yolk–shelled nickel–cobalt selenide dodecahedral nanocages from metal–organic frameworks for efficient hydrogen and oxygen evolution, *ACS Sustain. Chem. Eng.*, 6 (2018) 10952-10959.

[24] S. Shit, S. Chhetri, W. Jang, N.C. Murmu, H. Koo, P. Samanta, T. Kuila, Cobalt Sulfide/Nickel Sulfide Heterostructure Directly Grown on Nickel Foam: An Efficient and Durable Electrocatalyst for Overall Water Splitting Application, *ACS Appl. Mater. Inter.*, 10 (2018) 27712-27722.

[25] L. Lin, Q. Fu, Y. Han, J. Wang, X. Zhang, Y. Zhang, C. Hu, Z. Liu, Y. Sui, X. Wang, Fe doped skutterudite-type CoP<sub>3</sub> nanoneedles as efficient electrocatalysts for hydrogen and oxygen evolution in alkaline media, *J. Alloys Compd.*, 808 (2019) 151767.

[26] J. Yang, D. Guo, S. Zhao, Y. Lin, R. Yang, D. Xu, N. Shi, X. Zhang, L. Lu, Y.Q. Lan, J. Bao, M. Han, Cobalt Phosphides Nanocrystals Encapsulated by P-Doped Carbon and Married with P-Doped Graphene for Overall Water Splitting, *Small*, 15 (2019) 1804546.

[27] H. Jin, J. Wang, D. Su, Z. Wei, Z. Pang, Y. Wang, In situ cobalt–cobalt oxide/N-doped carbon hybrids as superior bifunctional electrocatalysts for hydrogen and oxygen evolution, *J. Am. Chem. Soc.*, 137 (2015) 2688-2694.

[28] S. Deng, S. Shen, Y. Zhong, K. Zhang, J. Wu, X. Wang, X. Xia, J. Tu, Assembling  $\text{Co}_9\text{S}_8$  nanoflakes on  $\text{Co}_3\text{O}_4$  nanowires as advanced core/shell electrocatalysts for oxygen evolution reaction, *J. Energy Chem.*, 26 (2017) 1203-1209.
